# Supplementary material for: Genomic Epidemiology of Colistin-resistant Enterobacterales from Dutch Patients: A Prospective Matched Case-control Study
Source: Research Square preprint supplement (doi:10.21203/rs.3.rs-870731/v1), 2021-10-11
Supplement: Supplementary file 1 [file 2c1dd09d313e077784b1cb85.xlsx]

## Sheet: Supplementary Table 1
Supplementary Table 1. Microbiological characteristics of the 26 sequenced K. pneumoniae isolates
isolate ID	ENA reads / NCBI mcr-plasmid accession numbers	Isolate type	Sender	Material of origin	MIC colistin	MLST ST	Serotype		Virulencefactors	antimicrobial resistance genes
							K-antigen	O-antigen	Yersiniabactin	mcr-1.1	mcr-9	aac(3)-IIa	aac(3)-IV	aac(6')-Ib3	aadA16	aadA2	aph(3'')-Ib	aph(3')-Ia	aph(4)-Ia	aph(6)-Id	blaCTX-M-14	blaCTX-M-15	blaCTX-M-9	blaLAP-2	blaOKP-B-8	blaOXA-1	blaSHV-172	blaSHV-187	blaSHV-26	blaSHV-27	blaSHV-33	blaSHV-36	blaSHV-71	blaSHV-80	blaSHV-Familie	blaTEM-1B	aac(6')-Ib-cr	fosA	fosA5	mph(A)	catA1	catA2	catB3	cmlA1	floR	oqxA	oqxB	QnrA1	QnrB1
RIVM_C019734	ERS7262536	Colistin-resistant	Hospital	Urine	16	ST45	K24	O2v1	1	0	0	0	0	0	0	0	0	0	0	0	0	0	0	0	0	0	0	0	0	0	0	0	0	0	99.88	0	0	100	0	0	0	0	0	0	0	99.23	98.57	0	0
RIVM_C019741	ERS7262538	Colistin-resistant	Hospital	Urine	32	ST104	K31	O3b	1	0	0	0	0	0	0	0	0	0	0	0	0	0	0	0	0	0	0	0	0	0	0	0	100	0	0	0	0	97.58	0	0	0	0	0	0	0	99.4	99.14	0	0
RIVM_C019742	ERS7262539	Colistin-susceptible	Hospital	Urine	0.25	ST309	K42	O4	0	0	0	0	0	0	0	0	0	0	0	0	0	0	0	0	0	0	0	0	0	0	0	0	0	0	99.88	0	0	99.29	0	0	0	0	0	0	0	100	100	0	0
RIVM_C019752	ERS7262542/CP081337	Colistin-resistant	Hospital	Rectum/perineum swab	16	ST709	K9	O1v2	0	100	0	100	0	0	0	99.49	100	100	0	100	0	100	0	0	0	100	0	0	100	0	0	0	0	0	0	100	100	99.52	0	100	0	0	100	99.92	98.19	99.23	98.86	0	100
RIVM_C019755	ERS7262543	Colistin-susceptible	Hospital	Urine	0.25	ST1044	K125	O12	0	0	0	0	0	0	0	0	0	0	0	0	0	0	0	0	99.07	0	0	0	0	0	0	0	0	0	0	0	0	95.48	0	0	0	0	0	0	0	93.72	95.41	0	0
RIVM_C019756	ERS7262544	Colistin-resistant	Hospital	Rectum/perineum swab	16	ST870	K17	O1v1	1	0	0	0	0	0	0	0	100	100	0	99.88	0	100	0	0	0	0	0	0	0	0	0	0	0	0	99.77	100	0	96.9	0	0	0	0	0	0	0	99.32	98.92	0	100
RIVM_C019768	ERS7262549	Colistin-susceptible	Hospital	Rectum/perineum swab	0.25	ST152	K105	O3b	0	0	0	0	99.87	0	0	100	0	0	100	0	0	0	0	100	0	0	0	99.88	0	0	0	0	0	0	0	0	0	99.29	0	0	0	0	0	0	0	100	99.27	0	0
RIVM_C019770	ERS7262551/CP081340	Colistin-resistant	Hospital	Rectum/perineum swab	32	ST3476	K123	O3b	0	0	100	0	0	0	99.65	0	0	0	0	0	0	0	100	0	0	0	0	99.65	0	0	0	0	0	0	0	0	100	98.1	0	0	0	0	0	0	0	99.49	98.51	99.85	0
RIVM_C019776	ERS7262552	Colistin-resistant	Hospital	Urine	16	ST15	K24	O1v1	0	0	0	0	0	0	0	100	99.88	100	0	100	0	0	0	0	0	0	0	0	0	0	0	0	0	0	0	0	0	99.52	0	0	99.85	0	0	0	0	99.23	98.86	0	0
RIVM_C019778	ERS7262553	Colistin-resistant	Hospital	Urine	8	ST2668	K111	OL103	0	0	0	0	0	0	0	0	0	0	0	0	0	0	0	0	0	0	0	0	0	0	99.77	0	0	0	0	0	0	97.15	0	0	0	0	0	0	0	99.32	98.48	0	0
RIVM_C019785	ERS7262555	Colistin-resistant	Hospital	Urine	8	ST184	K113	O1v2	0	0	0	0	0	0	0	0	0	0	0	0	0	0	0	0	0	0	0	0	0	100	0	0	0	0	0	0	0	96.67	0	0	0	0	0	0	0	99.74	98.89	0	0
RIVM_C019803	ERS7262565	Colistin-susceptible	Hospital	Urine	0.25	ST873	K38	O3b	0	0	0	0	0	0	0	0	0	0	0	0	100	0	0	100	0	0	0	0	0	0	0	0	0	0	99.88	0	0	100	0	0	0	0	0	0	0	99.23	98.57	0	0
RIVM_C019804	ERS7262566	Colistin-susceptible	Hospital	Urine	0.25	ST189	K128	O3b	0	0	0	0	0	0	0	0	0	0	0	0	0	0	0	0	0	0	0	0	0	0	0	0	0	100	0	0	0	99.76	0	0	0	0	0	0	0	99.66	99.08	0	0
RIVM_C019827	ERS7262576	Colistin-susceptible	Hospital	Rectum/perineum swab	0.125	ST1565-1LV	K31	O3b	0	0	0	0	0	0	0	0	0	0	0	0	0	0	0	0	0	0	0	0	0	0	0	0	0	0	99.77	0	0	99.27	0	0	0	0	0	0	0	99.4	99.46	0	0
RIVM_C019837	ERS7262579	Colistin-resistant	General practitioner	Urine	16	ST45	K24	O2v1	1	0	0	0	0	0	0	0	0	0	0	0	0	0	0	0	0	0	0	0	0	0	0	0	0	0	99.88	0	0	100	0	0	0	0	0	0	0	99.23	98.57	0	0
RIVM_C019838	ERS7262580	Colistin-susceptible	Hospital	Urine	0.25	ST45	K62	O2v1	1	0	0	0	0	0	0	100	0	0	0	0	0	0	0	0	0	0	0	0	0	0	0	0	0	0	99.88	0	0	100	0	100	0	0	0	0	0	99.23	98.57	0	0
RIVM_C000156	ERS7262584	Colistin-resistant	Hospital	Urine	64	ST25	K2	O1v2	0	0	0	0	0	0	0	0	0	0	0	0	0	0	0	0	0	0	0	0	0	0	0	0	0	0	99.77	0	0	99.51	0	0	0	0	0	0	0	99.57	98.67	0	0
RIVM_C019852	ERS7262585	Colistin-susceptible	General practitioner	Urine	0.25	ST34	K133	O2v2	0	0	0	0	0	0	0	0	0	0	0	0	0	0	0	0	0	0	0	0	100	0	0	0	0	0	0	0	0	0	98.34	0	0	0	0	0	0	0	0	0	0
RIVM_C000119	ERS7262590	Colistin-resistant	Hospital	Rectum/perineum swab	64	ST45	K24	O2v1	1	0	0	0	0	0	0	0	0	0	0	0	0	0	0	0	0	0	0	0	0	0	0	0	0	0	99.88	0	0	100	0	0	0	0	0	0	0	99.23	98.57	0	0
RIVM_C019878	ERS7262597	Colistin-resistant	General practitioner	Urine	16	ST2806	K62	O2v1	0	0	0	0	0	0	0	0	0	0	0	0	0	0	0	0	0	0	0	100	0	0	0	0	0	0	0	0	0	98.81	0	0	0	0	0	0	0	99.91	99.11	0	0
RIVM_C000127	ERS7262600	Colistin-susceptible	Hospital	Urine	0.5	ST661	K24	O2v1	1	0	0	0	0	0	0	0	0	0	0	0	0	0	0	0	0	0	0	0	0	100	0	0	0	0	0	0	0	99.05	0	0	0	0	0	0	0	99.15	99.05	0	0
RIVM_C019890	ERS7262605	Colistin-susceptible	Hospital	Rectum/perineum swab	0.5	ST253	K64	O1v1	0	0	0	0	0	0	0	0	0	0	0	0	0	0	0	0	0	0	0	0	0	0	0	100	0	0	0	0	0	100	0	0	0	0	0	0	0	0	0	0	0
RIVM_C019894	ERS7262608	Colistin-susceptible	General practitioner	Urine	0.5	ST48	K62	O1v1	0	0	0	0	0	0	0	0	0	0	0	0	0	0	0	0	0	0	99.88	0	0	0	0	0	0	0	0	0	0	96.9	0	0	0	0	0	0	0	0	0	0	0
RIVM_C019900	ERS7262610	Colistin-susceptible	Hospital	Rectum/perineum swab	0.125	ST147	K20	O2v1	0	0	0	0	0	0	0	100	99.88	100	0	100	0	100	0	0	0	0	0	0	0	0	0	0	0	0	99.77	0	0	98.79	0	100	0	96.11	0	0	0	99.49	98.54	0	0
RIVM_C000164	ERS7262619/CP081341	Colistin-resistant	Hospital	Urine	32	ST2278-2LV	K81	O1v1	0	0	100	0	0	100	0	0	0	0	0	0	0	0	100	0	0	0	0	0	0	0	0	0	0	0	99.77	0	99.61	99.76	0	0	0	0	0	0	0	0	0	99.85	0
RIVM_C028969	ERS7262622	Colistin-susceptible	Hospital	Urine	0.5	ST1558	K141	O4	0	0	0	0	0	0	0	0	0	0	0	0	0	0	0	0	0	0	0	99.54	0	0	0	0	0	0	0	0	0	98.1	0	0	0	0	0	0	0	99.4	98.99	0	0
Abbreviations: MIC: minimal inhibitory concentration, MLST: multilocus sequence typing, ST: sequence type
[truncated: 11 more columns]

## Sheet: Supplementary Table 2
Supplementary Table 2. Microbiological characteristics of the 66 sequenced E. coli isolates
Isolate ID	ENA reads/ NCBI mcr-plasmid accession numbers	Isolate type	Sender	Material of origin	MIC colistin	MLST ST	Serotype		Virulencefactors
							H-antigen	O-antigen	iss	lpfA	gad	capU	eilA	air	nfaE	mcmA	mchB	mchC	mchF	iroN	vat	astA	iha	sat	senB	ireA	pic	cnf1	celb	ORF4	aggA	aggC	ORF3	aggB	aggD	aaiC	aggR	aatA	aap	aar	cba	cma	espP	tsh	f17G	f17A	sfaS	cdtB	katP
RIVM_C019762	ERS7262547/CP081338	Colistin-resistant	Hospital	Rectum/perineum swab	2	10	H48	O154	100	0	100	0	0	0	0	0	0	0	0	100	0	0	0	0	0	0	0	0	92.47	0	0	0	0	0	0	0	0	0	0	0	0	0	0	0	0	0	0	0	0
RIVM_C019867	ERS7262593	Colistin-susceptible	General practitioner	Urine	0.5	10	H2	O86	100	0	100	100	0	0	0	0	0	0	0	0	0	0	100	99.97	0	0	100	0	0	99.81	99.6	99.71	99.51	99.32	99.21	100	100	99.84	100	100	0	0	0	0	0	0	0	0	0
RIVM_C019788	ERS7262556	Colistin-resistant	Hospital	Urine	8	14	H5	O18/O18ac	0	0	0	0	0	0	0	0	0	0	0	99.13	99.76	0	99.9	100	99.74	99.95	0	0	0	0	0	0	0	0	0	0	0	0	0	0	0	0	0	0	0	0	0	0	0
RIVM_C019824	ERS7262573	Colistin-resistant	General practitioner	Urine	4	14	H5	O18/O18ac	0	0	0	0	0	0	0	100	99.66	99.94	100	100	99.73	0	100	100	0	0	0	0	0	0	0	0	0	0	0	0	0	0	0	0	0	0	0	0	0	0	0	0	0
RIVM_C029625	ERS7262625	Colistin-susceptible	Hospital	Urine	0.25	58	H25	O9	100	100	0	0	0	0	0	0	0	0	0	0	0	100	0	0	0	99.95	0	0	0	0	0	0	0	0	0	0	0	0	0	0	0	0	0	0	0	0	0	0	0
RIVM_C019887	ERS7262604	Colistin-resistant	Hospital	Urine in case of bladder catheter	4	58	H25	O8	100	100	0	0	0	0	0	0	0	0	100	100	0	0	0	0	0	0	0	0	0	0	0	0	0	0	0	0	0	0	0	0	0	0	0	99.93	0	0	0	0	0
RIVM_C019749	ERS7262541	Colistin-resistant	Hospital	Urine in case of bladder catheter	4	59	H7	O1	0	98.43	0	99.91	99.18	97.15	0	0	0	0	0	0	0	0	99.9	99.87	0	100	0	0	0	0	0	0	0	0	0	0	0	0	0	0	0	0	0	0	0	0	0	0	0
RIVM_C019825	ERS7262574	Colistin-resistant	General practitioner	Urine	4	62	H45	O7	100	100	100	100	100	96.6	0	0	0	0	0	0	0	0	0	100	100	0	0	0	0	0	0	0	0	0	0	0	0	0	0	0	0	0	0	0	0	0	0	0	0
RIVM_C019743	ERS7262540	Colistin-susceptible	Hospital	Urine	0.25	69	H18	O15	100	100	100	0	100	95.79	0	0	0	0	0	0	0	0	0	0	0	0	0	0	0	0	0	0	0	0	0	0	0	0	0	0	0	0	0	0	0	0	0	0	0
RIVM_C029594	ERS7262624	Colistin-susceptible	General practitioner	Urine	0.25	69	H6	O23	100	100	0	0	99.94	96.31	0	0	0	0	100	100	0	0	0	0	0	0	0	0	0	0	0	0	0	0	0	0	0	0	0	0	0	0	0	99.95	0	0	0	0	0
RIVM_C019826	ERS7262575	Colistin-susceptible	General practitioner	Urine	0.25	69	H4	O117	100	100	100	0	100	0	0	0	0	0	0	0	0	0	100	100	0	0	0	0	0	0	0	0	0	0	0	0	0	0	0	0	0	0	0	0	0	0	0	0	0
RIVM_C019811	ERS7262569	Colistin-susceptible	General practitioner	Urine	0.25	69	H4	O117	100	100	0	0	100	96.31	0	0	0	0	0	0	0	0	0	100	0	0	0	0	0	0	0	0	0	0	0	0	0	0	0	0	0	0	0	0	0	0	0	0	0
RIVM_C019869	ERS7262595	Colistin-susceptible	General practitioner	Urine	0.5	69	H18	O45	100	100	99.43	0	100	97.09	0	0	0	0	0	0	0	0	100	100	100	0	0	0	0	0	0	0	0	0	0	0	0	0	0	0	0	0	0	0	0	0	0	0	0
RIVM_C019877	ERS7262596	Colistin-resistant	General practitioner	Urine	4	73	H1	O6	100	0	0	0	0	0	0	100	100	100	100	100	100	0	0	0	0	0	99.98	99.97	0	0	0	0	0	0	0	0	0	0	0	0	0	0	0	0	0	0	0	0	0
RIVM_C019808	ERS7262568	Colistin-resistant	General practitioner	Urine	4	73	H1	O18/O18ac	100	0	0	0	0	0	0	100	99.66	100	100	100	100	0	100	100	0	100	99.98	99.9	0	0	0	0	0	0	0	0	0	0	0	0	0	0	0	0	0	0	0	0	0
RIVM_C000123	ERS7262592	Colistin-resistant	Hospital	Urine	8	73	H1	O25	100	0	99.82	0	0	0	0	0	0	0	0	0	100	0	0	0	100	99.9	100	99.97	96.53	0	0	0	0	0	0	0	0	0	0	0	0	0	0	0	0	0	0	0	0
RIVM_C019927	ERS7262617	Colistin-susceptible	Hospital	Urine in case of bladder catheter	0.5	80	H7	O75	100	0	100	0	0	0	0	99.64	98.98	99.61	98.33	99.82	99.88	0	0	0	0	0	99.98	99.97	0	0	0	0	0	0	0	0	0	0	0	0	0	0	0	0	0	0	0	0	0
RIVM_C019769	ERS7262550	Colistin-resistant	Hospital	Rectum/perineum swab	8	93	H4	O7	0	0	99.85	99.82	0	0	0	0	0	0	0	0	0	0	0	0	0	0	0	0	0	0	0	0	0	0	0	0	0	0	0	0	0	0	0	0	0	0	0	0	0
RIVM_C028478	ERS7262620	Colistin-resistant	General practitioner	Urine	4	95	H7	O1	100	0	100	0	0	0	0	0	0	0	100	99.82	100	0	0	0	0	100	0	0	0	0	0	0	0	0	0	0	0	0	0	0	0	0	0	0	0	0	0	0	0
RIVM_C019922	ERS7262615	Colistin-susceptible	General practitioner	Urine	0.25	69	H2	Geen O-type gevonden	100	100	99.86	0	100	95.79	0	0	0	0	0	0	0	0	100	99.97	0	0	0	0	0	0	0	0	0	0	0	0	0	0	0	0	0	0	0	0	0	0	0	0	0
RIVM_C000128	ERS7262601	Colistin-resistant	Nursery home/Elderly home/Care center	Urine	4	95	H7	O2/O50/O2	100	0	100	0	0	0	0	0	0	0	0	0	99.98	0	0	0	100	99.95	0	0	0	0	0	0	0	0	0	0	0	0	0	0	0	0	0	0	0	0	0	0	0
RIVM_C019789	ERS7262557	Colistin-resistant	Hospital	Faeces	8	88	H17	O9	98.98	100	0	0	0	0	0	99.64	0	0	0	0	0	0	0	0	0	0	0	0	0	0	0	0	0	0	0	0	0	0	0	0	0	0	0	0	0	0	0	0	0
RIVM_C000126	ERS7262599	Colistin-resistant	Hospital	Faeces	8	106	H18	O17/O44/O17/O77	100	100	99.93	0	100	96.31	0	0	96.39	99.81	99.9	0	0	100	99.86	0	0	0	0	0	0	0	0	0	0	0	0	0	0	0	0	0	100	99.88	98.13	0	0	0	0	0	0
RIVM_C030689	ERS7262627	Colistin-susceptible	Hospital	Rectum/perineum swab	0.5	117	H4	O51	100	98.95	98.86	0	0	0	0	99.64	0	0	0	0	100	0	0	0	0	99.95	100	0	0	0	0	0	0	0	0	0	0	0	0	0	0	0	98.13	0	0	0	0	0	0
RIVM_C019865	ERS7262588	Colistin-resistant	Nursery home/Elderly home/Care center	Urine	8	126	H5	O2/O50/O2	0	0	99.82	0	0	0	0	100	100	99.94	99.95	100	100	0	0	0	0	0	0	99.93	0	0	0	0	0	0	0	0	0	0	0	0	0	0	0	0	0	0	0	0	0
RIVM_C019806	ERS7262567	Colistin-susceptible	Nursery home/Elderly home/Care center	Urine	0.25	127	H31	O6	100	0	0	0	0	0	0	0	0	0	0	0	99.95	0	0	0	0	0	0	99.97	0	0	0	0	0	0	0	0	0	0	0	0	0	0	0	0	0	0	0	0	0
RIVM_C019913	ERS7262612	Colistin-susceptible	Nursery home/Elderly home/Care center	Urine	0.25	127	H31	O6	100	0	0	0	0	0	0	100	0	0	0	0	0	0	0	0	0	0	0	99.93	0	0	0	0	0	0	0	0	0	0	0	0	0	0	0	0	0	0	0	0	0
RIVM_C019795	ERS7262562	Colistin-resistant	Nursery home/Elderly home/Care center	Urine	4	127	H31	O6	97.54	0	0	0	0	0	0	0	0	0	0	0	99.95	0	0	0	0	0	0	99.97	0	0	0	0	0	0	0	0	0	0	0	0	0	0	0	0	0	0	0	0	0
RIVM_C019792	ERS7262559	Colistin-resistant	General practitioner	Urine	4	131	H4	O25	100	0	99.81	0	0	0	0	0	0	0	0	100	0	0	100	0	0	0	0	0	0	0	0	0	0	0	0	0	0	0	0	0	0	100	0	100	0	0	0	0	0
RIVM_C019760	ERS7262546	Colistin-resistant	Hospital	Wound secretion	4	131	H4	O25	0	0	0	0	0	0	99.87	0	0	0	0	0	0	0	100	100	0	0	0	0	0	0	0	0	0	0	0	0	0	0	0	0	0	0	0	0	0	0	0	0	0
RIVM_C000155	ERS7262583	Colistin-resistant	General practitioner	Urine	4	131	H4	O25	100	0	99.71	0	0	0	99.87	0	0	0	0	0	0	0	0	0	100	0	0	0	0	0	0	0	0	0	0	0	0	0	0	0	0	0	0	0	0	0	0	0	0
RIVM_C019797	ERS7262563	Colistin-resistant	Nursery home/Elderly home/Care center	Urine	8	131	H4	O25	100	0	0	0	0	0	0	0	0	0	0	0	0	0	100	99.97	0	0	0	0	0	0	0	0	0	0	0	0	0	0	0	0	0	0	0	0	0	0	0	0	0
RIVM_C029681	ERS7262626	Colistin-susceptible	Nursery home/Elderly home/Care center	Urine	0.25	131	H4	O25	100	0	0	0	0	0	0	0	0	0	0	0	0	0	0	0	0	99.95	0	0	0	0	0	0	0	0	0	0	0	0	0	0	0	0	0	0	0	0	0	0	0
RIVM_C019831	ERS7262577	Colistin-resistant	General practitioner	Urine	8	131	H4	O25	100	0	99.73	0	0	0	0	0	0	0	0	0	0	0	100	100	100	0	0	0	0	0	0	0	0	0	0	0	0	0	0	0	0	0	0	0	0	0	0	0	0
RIVM_C019841	ERS7262582	Colistin-susceptible			0.25	131	H4	O25	100	0	99.71	0	0	0	0	0	0	0	100	100	0	0	0	0	0	0	0	0	0	0	0	0	0	0	0	0	0	0	0	0	0	0	0	0	0	0	0	0	0
RIVM_C019815	ERS7262571	Colistin-susceptible	Nursery home/Elderly home/Care center	Urine	0.25	131	H4	O25	100	0	99.72	0	0	0	0	0	0	0	0	0	0	0	0	0	100	0	0	0	0	0	0	0	0	0	0	0	0	0	0	0	0	0	0	0	0	0	0	0	0
RIVM_C019784	ERS7262554	Colistin-susceptible	Hospital	Rectum/perineum swab	0.25	136	H10	O8	99.35	0	99.82	0	0	0	0	0	0	0	0	98.67	99.81	0	0	0	0	0	100	0	0	0	0	0	0	0	0	0	0	0	0	0	0	0	0	0	0	0	0	0	0
RIVM_C019906	ERS7262611	Colistin-resistant	Hospital	Blood	4	140	H5	O2/O50/O2	100	0	100	0	0	0	0	0	0	0	100	0	99.96	0	0	0	0	99.95	0	0	0	0	0	0	0	0	0	0	0	0	0	0	0	0	0	0	0	0	0	0	0
RIVM_C019737	ERS7262537	Colistin-resistant	Hospital	Urine	8	141	H6	O2/O50/O2	0	0	0	0	0	0	0	99.64	100	99.94	99.91	100	100	99.15	0	0	0	0	0	99.97	0	0	0	0	0	0	0	0	0	0	0	0	0	0	0	0	0	0	99.59	0	0
RIVM_C019835	ERS7262578	Colistin-susceptible	Hospital	Faeces	0.5	155	H10	O37	0	100	0	0	0	0	0	0	0	0	0	0	0	0	0	0	0	0	0	0	0	0	0	0	0	0	0	0	0	0	0	0	0	0	0	0	0	0	0	0	0
RIVM_C019864	ERS7262587	Colistin-resistant	Hospital	Faeces	8	224	H23	O8	0	99.83	100	0	0	0	0	0	0	0	0	0	0	0	0	0	0	0	0	0	0	0	0	0	0	0	0	0	0	0	0	0	0	0	0	0	0	0	0	0	0
RIVM_C000121	ERS7262591	Colistin-resistant	Nursery home/Elderly home/Care center	Urine	4	224	H23	O8	0	99.83	100	0	0	0	0	0	0	0	0	0	0	0	0	0	0	0	0	0	0	0	0	0	0	0	0	0	0	0	0	0	0	0	0	0	0	0	0	0	0
RIVM_C019793	ERS7262560	Colistin-susceptible	Hospital	Rectum/perineum swab	0.25	357	H4	O13/O13/O135	99.68	0	99.91	0	0	0	0	0	0	0	0	98.62	99.81	0	0	0	0	0	0	0	0	0	0	0	0	0	0	0	0	0	0	0	0	0	0	0	0	0	0	0	0
RIVM_C019862	ERS7262586	Colistin-susceptible	General practitioner	Urine	0.25	357	H4	O13/O13/O135	99.68	0	0	0	0	0	0	0	0	0	0	98.62	99.81	0	0	0	0	0	0	0	0	0	0	0	0	0	0	0	0	0	0	0	0	0	0	0	0	0	0	0	0
RIVM_C019814	ERS7262570	Colistin-susceptible	Hospital	Urine	0.25	372	H31	Geen O-type gevonden	100	0	0	0	0	0	0	100	100	99.87	99.95	100	99.47	0	0	0	0	0	0	99.9	0	0	0	0	0	0	0	0	0	0	0	0	0	0	0	0	0	0	0	0	0
RIVM_C000124	ERS7262598	Colistin-resistant	General practitioner	Urine	8	404	H5	O75	0	0	0	0	0	0	0	0	0	0	0	0	99.76	0	100	100	100	0	0	0	0	0	0	0	0	0	0	0	0	0	0	0	0	0	0	0	0	0	0	0	0
RIVM_C019868	ERS7262594	Colistin-susceptible	General practitioner	Urine	0.5	404	H5	O75	0	0	0	0	0	0	99.87	0	0	0	0	0	99.76	0	100	100	100	0	0	0	0	0	0	0	0	0	0	0	0	0	0	0	0	0	0	0	0	0	0	0	0
RIVM_C019794	ERS7262561	Colistin-resistant	Hospital	Urine	4	404	H5	O75	0	0	99.86	0	0	0	99.87	0	0	0	0	0	99.76	0	0	0	0	0	0	0	0	0	0	0	0	0	0	0	0	0	0	0	0	0	0	0	0	0	0	0	0
RIVM_C019767	ERS7262548	Colistin-resistant	Hospital	Rectum/perineum swab	8	410	H21	O8	99.66	100	0	0	0	0	0	0	0	0	0	0	0	0	0	0	0	0	0	0	0	0	0	0	0	0	0	0	0	0	0	0	0	0	0	0	0	0	0	0	0
RIVM_C019886	ERS7262603	Colistin-susceptible	General practitioner	Urine	0.5	420	H31	O134	0	0	0	0	0	0	0	0	0	0	0	0	99.9	0	0	0	100	0	0	0	0	0	0	0	0	0	0	0	0	0	0	0	0	0	0	0	0	0	0	0	0
RIVM_C019919	ERS7262614	Colistin-susceptible	Hospital	Urine	0.5	537	H5	O75	100	0	0	0	0	0	0	100	100	99.94	100	100	99.76	0	0	0	0	0	99.95	99.97	0	0	0	0	0	0	0	0	0	0	0	0	0	0	0	0	0	0	0	0	0
RIVM_C019928	ERS7262618	Colistin-susceptible	Nursery home/Elderly home/Care center	Urine	0.5	569	H31	O134	0	0	0	0	0	0	0	0	0	0	0	0	99.9	0	0	0	99.91	0	0	0	0	0	0	0	0	0	0	0	0	0	0	0	0	0	0	0	0	0	0	0	0
RIVM_C029515	ERS7262623/CP081339	Colistin-resistant	Hospital	Rectum/perineum swab	4	602	H21	Geen O-type gevonden	100	100	100	0	0	0	0	0	0	0	0	99.91	0	0	0	0	0	0	0	0	0	0	0	0	0	0	0	0	0	0	0	0	0	100	0	0	0	0	0	0	0
RIVM_C019880	ERS7262602	Colistin-resistant	Hospital	Urine	4	636	H7	Geen O-type gevonden	0	0	99.43	0	0	0	0	0	0	0	0	0	99.85	0	0	0	0	0	0	0	0	0	0	0	0	0	0	0	0	0	0	0	0	0	0	0	0	0	0	0	0
RIVM_C019757	ERS7262545	Colistin-susceptible	Hospital	Urine	0.25	1057	H5	O75	0	0	99.91	0	0	0	0	100	100	99.87	100	100	99.76	0	100	100	0	100	0	99.97	0	0	0	0	0	0	0	0	0	0	0	0	0	0	0	0	0	0	0	0	0
RIVM_C019893	ERS7262607	Colistin-susceptible	Hospital	Urine	0.25	1081	H25	O136	90.54	100	100	0	0	0	0	0	0	0	0	0	0	0	0	0	0	0	0	0	0	0	0	0	0	0	0	0	0	0	0	0	0	0	0	0	99.9	0	0	100	0
RIVM_C019866	ERS7262589	Colistin-resistant	Hospital	Rectum/perineum swab	16	1193	H5	O75	0	0	99.91	0	0	0	0	0	0	0	0	0	99.69	0	100	99.92	100	0	0	0	0	0	0	0	0	0	0	0	0	0	0	0	0	0	0	0	0	0	0	0	0
RIVM_C019802	ERS7262564	Colistin-resistant	Hospital	Urine	8	1193	H5	O75	0	0	100	0	0	0	0	0	0	0	0	0	99.71	0	100	99.9	0	0	0	0	0	0	0	0	0	0	0	0	0	0	0	0	0	0	0	0	0	0	0	0	0
RIVM_C028932	ERS7262621	Colistin-resistant	Hospital	Urine	4	1722	H25	O1	99.66	99.83	98.36	0	99.41	98.17	0	0	0	0	0	0	0	0	0	0	0	0	0	0	0	0	0	0	0	0	0	0	0	0	0	0	0	0	0	0	0	0	0	0	0
RIVM_C019839	ERS7262581	Colistin-susceptible	Hospital	Wound secretion	0.5	1993	H6	O2/O50/O2	97.28	0	0	0	0	0	0	100	100	100	100	100	100	0	0	0	0	0	95.56	99.97	0	0	0	0	0	0	0	0	0	0	0	0	0	0	0	0	0	0	0	0	0
RIVM_C019917	ERS7262613	Colistin-susceptible	Hospital	Faeces	0.25	2163	H37	Geen O-type gevonden	0	100	0	0	0	0	0	0	0	0	0	0	0	0	0	0	0	0	0	0	0	0	0	0	0	0	0	0	0	0	0	0	0	0	0	0	0	0	0	0	0
RIVM_C019891	ERS7262606	Colistin-susceptible	Hospital	Rectum/perineum swab	0.5	2522	H8	O25	98.64	100	98.14	0	0	0	0	0	0	0	0	0	0	100	0	0	0	0	0	0	0	0	0	0	0	0	0	0	0	0	0	0	0	0	0	0	99.9	94.89	0	0	0
RIVM_C019896	ERS7262609	Colistin-susceptible	Hospital	Faeces	0.25	3594	H7	O8	100	100	0	0	0	0	0	0	0	0	0	0	0	0	0	0	0	0	0	0	0	0	0	0	0	0	0	0	0	0	0	0	100	100	0	0	0	0	0	0	0
RIVM_C019790	ERS7262558	Colistin-susceptible	Hospital	Rectum/perineum swab	0.125	6459	H42	O51	99.66	0	0	0	98.35	96.11	0	0	0	0	0	0	0	0	0	0	0	0	0	0	0	0	0	0	0	0	0	0	0	0	0	0	100	100	0	0	0	0	0	0	0
RIVM_C019817	ERS7262572	Colistin-susceptible	Hospital	Urine in case of bladder catheter	0.25	11141	H18	O17/O44/O17/O77	100	100	0	0	100	90	0	0	0	0	0	0	0	0	99.81	0	0	0	0	0	0	0	0	0	0	0	0	0	0	0	0	0	0	0	0	0	0	0	0	0	0
RIVM_C019926	ERS7262616	Colistin-susceptible	Hospital	Blood	0.5	11142	H18	O17/O44/O17/O77	100	100	99.43	0	100	96.23	0	0	0	0	99.81	100	0	0	0	0	0	0	0	0	0	0	0	0	0	0	0	0	0	0	0	0	0	100	0	0	0	0	0	0	98.33
Abbreviations: MIC: minimal inhibitory concentration, MLST: multilocus sequence typing, ST: sequence type
[truncated: 57 more columns]

## Sheet: Supplementary Table 3
Supplementary Table 3. Overview of isolates with mcr genes or chromosomal mutations, potentially involved in colistin resistance
Isolate ID	MIC colistin	mcr	pmrA	pmrB	mgrB	crrB	phoP	phoQ
K. pneumoniae
RIVM_C019734	16	no		R256G (C766G)		gene absent
RIVM_C019741	32	no		R256G (C766G)
RIVM_C019742	0.25	no		R256G (C766G)		gene absent
RIVM_C019755	0.25	no				gene absent
RIVM_C019756	16	no				gene absent
RIVM_C019770	32	mcr-9			C39Y (G116A)	gene absent
RIVM_C019776	16	no			first 39 bp are absent	gene absent
RIVM_C019778	8	no			insertion of ISEc68 on position 74	gene absent
RIVM_C019785	8	no			G37S (G109A)
RIVM_C019837	16	no		R256G (C766G); T157P (A469C)		gene absent
RIVM_C019838	0.25	no		R256G (C766G)
RIVM_C000156	64	no			absent	deletion of 955 bp
RIVM_C019852	0.25	no				gene absent
RIVM_C000119	64	no		R256G (C766G)	insertion of IS-like element on position 46	gene absent
RIVM_C019878	16	no			insertion of IS-like element on position 70	gene absent
RIVM_C019900	0.125	no		R256G (C766G)
RIVM_C028969	0.5	no				gene absent
RIVM_C019752	16	mcr-1.1
RIVM_C000164	32	mcr-9
E. coli
RIVM_C019737	8	no		E126D(A376T); V128E(T382A); V354I(G1060A); N361Y (A1081T)
RIVM_C019743	0.25	no		N361Y (A1081T)				S138T (T412A)
RIVM_C019749	4	no		T159M (C475T); N361Y (A1081T)
RIVM_C019757	0.25	no		E126D(A376T); V354I(G1060A); N361Y (A1081T)
RIVM_C019760	4	no		E126D(A376T); V354I(G1060A); N361Y (A1081T)
RIVM_C019762	2	mcr-1.1		N361Y (A1081T); R5H (G14A)
RIVM_C019767	8	no		V91E(T272A); R5H (G14A)
RIVM_C019769	8	no		N361Y (A1081T); R5H (G14A)				E464D(G1392T)
RIVM_C019784	0.25	no		E126D(A376T); V354I(G1060A); N361Y (A1081T)
RIVM_C019788	8	no		E126D(A376T); V354I(G1060A); N361Y (A1081T)
RIVM_C019789	8	no		extra triplet (GCG) with amino acid A on position 266; R5H (G14A)
RIVM_C019790	0.125	no		N361Y (A1081T)
RIVM_C019792	4	mcr-1.1		E126D(A376T); V354I(G1060A); N361Y (A1081T)
RIVM_C019793	0.25	no		E126D(A376T); N156S(C466G); V354I(G1060A); N361Y (A1081T)
RIVM_C019794	4	no		E126D(A376T); V354I(G1060A); N361Y (A1081T)
RIVM_C019795	4	no		N361Y (A1081T); V161G (G482C)
RIVM_C019797	8	no		E126D(A376T); V354I(G1060A); N361Y (A1081T)
RIVM_C019802	8	no		E126D(A376T); V354I(G1060A); N361Y (A1081T)
RIVM_C019806	0.25	no		N361Y (A1081T)
RIVM_C019808	4	no		L105Q (T314A); E126D(A376T); V354I(G1060A); N361Y (A1081T)
RIVM_C019811	0.25	no		N361Y (A1081T)				S138T (T412A)
RIVM_C019814	0.25	no		E126D(A376T); V354I(G1060A); N361Y (A1081T)
RIVM_C019815	0.25	no		E126D(A376T); V354I(G1060A); N361Y (A1081T)
RIVM_C019817	0.25	no		N361Y (A1081T); V161G (G482C)				S138T (T412A)
RIVM_C019824	4	no		E126D(A376T); V354I(G1060A); N361Y (A1081T)
RIVM_C019825	4	no	N67K (C200A+C201A); D68E (C204A)	N361Y (A1081T); M4I (G12C)
RIVM_C019826	0.25	no		N361Y (A1081T)				S138T (T412A)
RIVM_C019831	8	no		E126D(A376T); V354I(G1060A); N361Y (A1081T)
RIVM_C019835	0.5	no		R5H (G14A)
RIVM_C019839	0.5	no		E126D(A376T); V354I(G1060A); N361Y (A1081T)
RIVM_C019841	0.25	no		E126D(A376T); V354I(G1060A); N361Y (A1081T)
RIVM_C000155	4	no		E126D(A376T); V354I(G1060A); N361Y (A1081T)
RIVM_C019862	0.25	no		E126D(A376T); N156S(C466G); V354I(G1060A); N361Y (A1081T)
RIVM_C019864	8	no		V91E(T272A+A273G); R5H (G14A)
RIVM_C019865	8	no		E126D(A376T); V354I(G1060A); N361Y (A1081T)
RIVM_C019866	16	no		first 48 bp are absent; E126D(A376T); V354I(G1060A); N361Y (A1081T)			V88A(T263C)
RIVM_C000123	8	no		E126D(A376T); V354I(G1060A); N361Y (A1081T)
RIVM_C019867	0.5	no		N361Y (A1081T); R5H (G14A)
RIVM_C019868	0.5	no		E126D(A376T); V354I(G1060A); N361Y (A1081T)
RIVM_C019869	0.5	no		N361Y (A1081T)				S138T (T412A)
RIVM_C019877	4	no		E126D(A376T); V354I(G1060A); N361Y (A1081T)
RIVM_C000124	8	no		E126D(A376T); V354I(G1060A); N361Y (A1081T)
RIVM_C000126	8	no		N361Y (A1081T)				S138T (T412A)
RIVM_C000128	4	no		E126D(A376T); V354I(G1060A); N361Y (A1081T)
RIVM_C019880	4	no		E126D(A376T); V354I(G1060A); N361Y (A1081T)
RIVM_C019886	0.5	no		E126D(A376T); V354I(G1060A); N361Y (A1081T)				L467M(C1399A+T1401G)
RIVM_C019887	4	no		R5H (G14A)
RIVM_C019891	0.5	no		R5H (G14A)
RIVM_C019893	0.25	no		R5H (G14A)
RIVM_C019906	4	no		E126D(A376T); V354I(G1060A); N361Y (A1081T)
RIVM_C019913	0.25	no		N361Y (A1081T)
RIVM_C019919	0.5	no		E126D(A376T); V354I(G1060A); N361Y (A1081T)
RIVM_C019917	0.25	no		R5H (G14A)
RIVM_C019922	0.25	no		N361Y (A1081T)				S138T (T412A)
RIVM_C019926	0.5	no		N361Y (A1081T)				S138T (T412A)
RIVM_C019927	0.5	no		E126D(A376T); V354I(G1060A); N361Y (A1081T)			V71F(G211T)
RIVM_C019928	0.5	no		E126D(A376T); V354I(G1060A); N361Y (A1081T)				L467M(C1399A+T1401G)
RIVM_C028478	4	no		E126D(A376T); V354I(G1060A); N361Y (A1081T)
RIVM_C028932	4	no		N361Y (A1081T); M4I (G12C)
RIVM_C029515	4	mcr-1.1		R5H (G14A)				I175F(A523T)
RIVM_C029594	0.25	no		N361Y (A1081T)				S138T (T412A)
RIVM_C029625	0.25	no		R5H (G14A)
RIVM_C029681	0.25	no		E126D(A376T); V354I(G1060A); N361Y (A1081T)
RIVM_C030689	0.5	no		N361Y (A1081T)
RIVM_C000121	4	mcr-1.1		R5H (G14A)
Abbreviations: bp: base pairs, MIC: minimal inhibitory concentration.
